# Supplementary material for: Improving management of gout in primary care using a customised electronic records template
Source: PubMed Central journal article supplement — BMJ Qual Improv Rep. 2015 Jun 12;4(1):u204832.w2038. doi: 10.1136/bmjquality.u204832.w2038 (PMC4645842; doi:10.1136/bmjquality.u204832.w2038), 2015-06-12
Supplement: bmjqir-4-u204832-w2038-s2.pdf [file bmjqir-4-u204832-w2038-s2.pdf]

|                                    | Baseline   | 2 month<br>(Audit standard 60%) | 4month<br>(Audit standard 80%) |
|------------------------------------|------------|---------------------------------|--------------------------------|
| SUA measured in the last 12 months | 51 (40.4%) | 103 (81.7%)                     | 112 (84.2%)                    |
| SUA<300µmol/l                      | 88 (25.5%) | 57 (33.1%)                      | 79 (51.8%)                     |
| Lifestyle advice                   | 0 (0%)     | 75 (59.5%)                      | 76 (57.1%)                     |

*Table 1* Results (green shows audit standards achieved)
